# Supplementary material
Source: HighWire-hosted journal article supplement (https://www.jpn.ca/highwire/filestream/89772/field_highwire_adjunct_files/0/jpn-130189-1-at.pdf)
Supplement: jpn-130189-1-at.pdf [file jpn-130189-1-at.pdf]

**Appendix 1** to Forstner AJ, Basmanav FB, Mattheisen M, et al. Investigation of the involvement of MIR185 and its target genes in the development of schizophrenia. *J Psychiatry Neurosci* 2014.

DOI: 10.1503/jpn.130189

Copyright © 2014 The Author(s) or their employer(s). To receive this resource in an accessible format, please contact us at [cmajgroup@cmaj.ca](mailto:cmajgroup@cmaj.ca).

### **Genetic Risk and Outcome in Psychosis (GROUP Investigators)**

René S. Kahn,<sup>1</sup> Don H. Linszen,<sup>2</sup> Jim van Os,<sup>3</sup> Durk Wiersma,<sup>4</sup> Richard Bruggeman,<sup>4</sup> Wiepke Cahn,<sup>1</sup> Lieuwe de Haan,<sup>2</sup> Lydia Krabbendam<sup>3</sup> and Inez Myin-Germeys<sup>3</sup>

From the <sup>1</sup>Department of Psychiatry, Rudolf Magnus Institute of Neuroscience, University Medical Center Utrecht, Utrecht, The Netherlands; <sup>2</sup>Academic Medical Centre University of Amsterdam, Department of Psychiatry, Amsterdam, The Netherlands; <sup>3</sup>Maastricht University Medical Centre, South Limburg Mental Health Research and Teaching Network, Maastricht, The Netherlands and <sup>4</sup>University Medical Center Groningen, Department of Psychiatry, University of Groningen, Groningen, The Netherlands

**Competing interests:** None declared.

**Contributors:** All authors acquired the data, reviewed the article, and approved the final version for publication.
